# Supplementary material for: Evaluation of SARS-CoV-2 in Human Semen and Effect on Total Sperm Number: A Prospective Observational Study
Source: PubMed Central journal article supplement — World J Mens Health. 2021 Feb 24;39(3):489–95. doi: 10.5534/wjmh.200192 (PMC8255403; doi:10.5534/wjmh.200192), 2021-02-24
Supplement: wjmh-39-489-s001.pdf [file wjmh-39-489-s001.pdf]

**Supplement Table 1.** Control group demographics

| Variable                 | Value           |
|--------------------------|-----------------|
| Median age (y)           | 42 (IQR=9.8)    |
| BMI (kg/m <sup>2</sup> ) | 27.3 (IQR=2.98) |
| Smoking status           |                 |
| Never                    | 91.0            |
| Former                   | 9.0             |

Values are presented as median (IQR) or percentage only.  
BMI: body mass index, IQR: interquartile range.
