# Supplementary material for: Evaluation of SARS-CoV-2 in Human Semen and Effect on Total Sperm Number: A Prospective Observational Study
Source: PubMed Central journal article supplement — World J Mens Health. 2021 Feb 24;39(3):489–95. doi: 10.5534/wjmh.200192 (PMC8255403; doi:10.5534/wjmh.200192), 2021-02-24
Supplement: wjmh-39-489-s002.pdf [file wjmh-39-489-s002.pdf]

**Supplement Table 2.** Semen characteristics of patients with follow-up

| Variable                                           | Patient No. |      |      |           |           |
|----------------------------------------------------|-------------|------|------|-----------|-----------|
|                                                    | 1           | 2    | 3    | 4         | 5         |
| Semen characteristics following COVID-19 diagnosis |             |      |      |           |           |
| Volume (mL)                                        | 2.6         | 2.2  | 2.0  | 2.0       | 2.1       |
| Sperm concentration ( $\times 10^6$ /mL)           | 22          | 20   | 11   | 5         | 0.17      |
| Total sperm number (million)                       | 57.2        | 44   | 22   | 10        | 0.36      |
| Sperm total motility (%)                           | 0           | 0    | 0    | 0         | 14        |
| Semen (pH)                                         | 7.6         | 7.4  | 7.6  | 6.8       | 7.6       |
| Follow-up semen characteristics                    |             |      |      |           |           |
| Volume (mL)                                        | 0.3         | 1.5  | 1.6  | 2.1       | 1.0       |
| Sperm concentration ( $\times 10^6$ /mL)           | 20          | 12   | 21   | 20        | 12        |
| Total sperm number (million)                       | 6           | 18   | 33.6 | 42        | 12        |
| Sperm total motility (%)                           | 0           | 0    | 0    | 69        | 39        |
| Semen (pH)                                         | 7.6         | 7.6  | 7.2  | 7.6       | 7.6       |
| In-person/mailed sample <sup>a</sup>               | Mail        | Mail | Mail | In-person | In-person |

Values are presented as median.

COVID-19: coronavirus disease.

<sup>a</sup>In-person: samples provided in-office, mail: samples were shipped overnight.
